# Supplementary material
Source: PubMed Central journal article supplement (PMC3082461)
Supplement: NIHMS281522-supplement-supplemental_data.pdf [file NIHMS281522-supplement-supplemental_data.pdf]

## Supplemental Data

### The “Soluble” Adenylyl Cyclase in Sperm

### Mediates Multiple Signaling Events

### Required for Fertilization

Kenneth C. Hess, Brian H. Jones, Becky Marquez, Yanqiu Chen, Teri S. Ord, Margarita Kamenetsky, Catarina Miyamoto, Jonathan H. Zippin, Gregory S. Kopf, Susan S. Suarez, Lonny R. Levin, Carmen J. Williams, Jochen Buck, and Stuart B. Moss

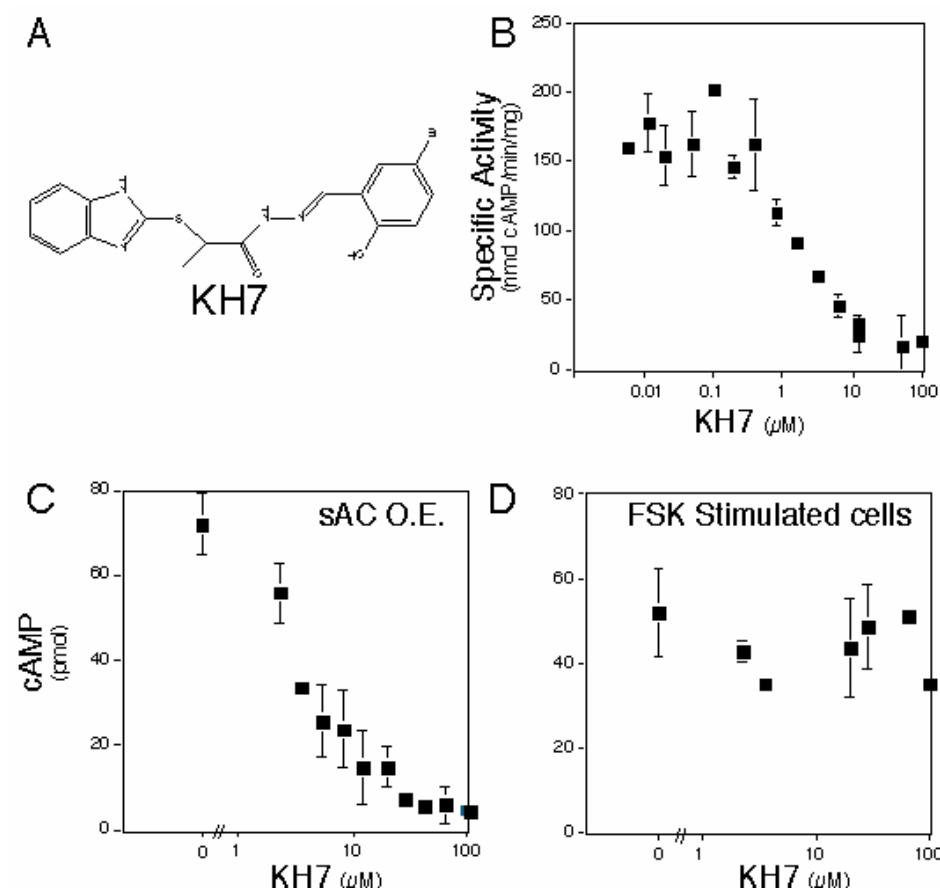

Figure S1. KH7 Differentiates between sAC- and tmAC-Generated cAMP

(A) Chemical structure of KH7.

(B) In vitro cyclase activity of bicarbonate/calcium-stimulated pure sAC<sub>1</sub> protein in the presence of the indicated concentration of KH7.

(C) cAMP accumulation in sAC<sub>1</sub>-overexpressing cells in the presence of the indicated concentration of KH7.

(D) cAMP accumulation in forskolin-stimulated HEK293 (parental) cells in the presence of the indicated concentration of KH7. Data represents averages of triplicate determinations with standard deviations indicated. Each experiment was replicated at least three times with similar results.
